# Supplementary material for: The role of ArlRS in regulating oxacillin susceptibility in methicillin-resistant Staphylococcus aureus indicates it is a potential target for antimicrobial resistance breakers
Source: Emerg Microbes Infect. 2019 Mar 29;8(1):503–15. doi: 10.1080/22221751.2019.1595984 (PMC6455253; doi:10.1080/22221751.2019.1595984)
Supplement: Supplemental Material [file TEMI_A_1595984_SM1321.pdf]

## Supplementary Information

**Supplementary Table 1. Primers used in this study**

| Primers                                                 | Sequence 5'-3'                               | Restriction Site |
|---------------------------------------------------------|----------------------------------------------|------------------|
| <b>For construction of <i>arlRS</i> deletion mutant</b> |                                              |                  |
| arlRS-UF                                                | GGGGTACCAAAAAACAAAAGCAGTAAACCTAAAG           | KpnI             |
| arsRS-UR                                                | GACGTCTCAGTCATGACCTCATATTACGACTTTTTC<br>TAA  |                  |
| arlRS-DF                                                | TTAGAAAAAGTCGTAATATGAGGTCATGACTGAGA<br>CGTC  |                  |
| arlRS-DR                                                | CGACGCGTGCATTGTACCGTATGAATCAG                | MluI             |
| <b>For construction of asRNA plasmids</b>               |                                              |                  |
| asrarlR-F                                               | GAAGATCTTCGTAATATGAGGTGTACAAATG              | BglII            |
| asrarlR-R                                               | AGCGGCCGCGCTCTTGTCATCATACTC                  | EagI             |
| asrarlS-F                                               | GAAGATCTCAAAACGTAAATTGCGCAAT                 | BglII            |
| asrarlS-R                                               | AGCGGCCGCTTCGTTCTGCATCATCAA                  | EagI             |
| asspx-F                                                 | GAAGATCTCAAATAGGAGAGTGAGATGTATG              | BglII            |
| asspx-R                                                 | AGCGGCCGCATCAATTGTTAAATGTTTCAGAA             | EagI             |
| <b>For construction of GFP reporter plasmids</b>        |                                              |                  |
| SA- <i>spx</i> -pro-GFP-F                               | CTCGCTAGCCACTAGGTTGGATGCCTG                  | NheI             |
| SA- <i>spx</i> -pro-GFP-R                               | CTCGGTACCTCATTGCTTAAAATTTAGTTATAGATCA<br>AG  | BamHI            |
| SA- <i>mgrA</i> -pro-GFP-F                              | CACGCTAGCCGTTAATTATGGATATTCTTATTTTTTC<br>ATC | NheI             |
| SA- <i>mgrA</i> -pro-GFP-R                              | CACGGTACCCAGACATACTATCCGTTTTTTTCTC           | BamHI            |
| <b>For construction of complemented plasmids</b>        |                                              |                  |

|                        |                                                       |       |
|------------------------|-------------------------------------------------------|-------|
| SA- <i>arlRSc</i> -R   | GTT <u>GGATCCT</u> GA <del>CTTT</del> GATTGACGTCTCAGT | BamHI |
| SA- <i>arlRSc</i> -F   | GTTGTCGACTGTGTGAAATGTTTAAACTACGGT                     | Sall  |
| SA- <i>spx</i> -RBS-F  | CTC <u>GGTACCT</u> AGGAGAGTGAGATGTATGGTAAC            | BamHI |
| SA- <i>spx</i> -RBS-R  | CTC <u>GAATTCT</u> TAGTCAACCATACGTTGTGC               | EcoRI |
| SA- <i>trfA</i> -RBS-F | CTC <u>GGTACCT</u> GTAAAGAGTGAGATGATATGAGA            | BamHI |
| SA- <i>trfA</i> -RBS-R | CTC <u>GGTACC</u> ATCGTTATTCAGTTGTCTCTGG              | KpnI  |

#### For detection of gene expression by qPCR

|                        |                        |
|------------------------|------------------------|
| SA- <i>arlR</i> -qRT-S | TTCTTCAATATCAAACGGCTTA |
| SA- <i>arlR</i> -qRT-R | GACAACAATCTACACCTAT    |
| SA- <i>mgrA</i> -qRT-S | AACGAATGGAACAAGTAG     |
| SA- <i>mgrA</i> -qRT-R | ACCTAATAAGCGATTAAGTT   |
| SA- <i>spx</i> -qRT-S  | GTTGATATTGATTCACTACCA  |
| SA- <i>spx</i> -qRT-R  | CGTTGTGCTTCTTGTAAT     |
| SA- <i>trfA</i> -qRT-S | ATCGAGGCCCGTGGATTTAG   |
| SA- <i>trfA</i> -qRT-R | TCGACACCTTTTTCAAAGGCA  |

#### For protein expression

|           |                                       |      |
|-----------|---------------------------------------|------|
| REarlR-F  | TCGTCTAGAAAAAGTCGTAATATGAGGTGTAC      | XbaI |
| REarlR-R  | TCGCTCGAGTCGTATCACATACCCAACGC         | XhoI |
| RarlSHK-f | TCGCCATGGTTGAAGATGCGTCACATGA          | NcoI |
| RarlSHK-r | TCGCTCGAGAAATATGATTTTAAACGTTGTTCCCTTT | XhoI |
|           | G                                     |      |

#### For nucleotides amplification for EMSA

|                              |                                       |
|------------------------------|---------------------------------------|
| SA- <i>spx</i> -pro-short-F  | TAATTATCATTATAACAGTATTTCTTAAAAATGTAAG |
| SA- <i>spx</i> -pro-short-R2 | CATTAAAATTAAATGAGAAAAACCTA            |
| SA- <i>arl</i> -pro-short-F  | GAGTTAATAAATAATTAATGATTGTAGCT         |
| SA- <i>arl</i> -pro-short-R  | ACTTTTTCTAATAAGGTAATATATTTTAAATTTTG   |

---

**Supplementary Table 2. The MICs (mg/L) of antibiotics for USA300 and its transposon insertion mutants (the broth microdilution method)**

| <b>Antibiotics</b> | <b>USA300<br/>WT</b> | <b>USA300<br/><i>-arlS</i></b> | <b>USA300<br/><i>-arlR</i></b> | <b>Quality Control<br/>ATCC29213</b> |
|--------------------|----------------------|--------------------------------|--------------------------------|--------------------------------------|
| Oxacillin          | 64                   | 8                              | 16                             | 0.25                                 |
| Vancomycin         | 2                    | 4                              | 2                              | 2                                    |
| Teicoplanin        | 1                    | 1                              | 1                              | 1                                    |
| Linezolid          | 4                    | 2                              | 2                              | 2                                    |
| Daptomycin         | 1                    | 2                              | 1                              | 1                                    |
| Rifampicin         | 0.03                 | 0.25                           | 0.06                           | 0.015                                |
| Gentamicin         | 0.5                  | 8                              | 2                              | 1                                    |
| Minocycline        | 0.25                 | 2                              | 0.25                           | 0.25                                 |

**Supplementary Table 3. The MICs for Oxacillin in the clinical MRSA strains**

|                | MRSA Strain 1<br>234 | MRSA Strain 2<br>15098 | MRSA Strain 3<br>184749 |
|----------------|----------------------|------------------------|-------------------------|
| pMX            | 128                  | 128                    | 64                      |
| pMX-arlR       | 128                  | 128                    | 64                      |
| pMX-arlS       | 128                  | 128                    | 64                      |
| pMX + ATc      | 64                   | 128                    | 64                      |
| pMX-arlR + ATc | 32                   | 32                     | 16                      |
| pMX-arlS + ATc | 32                   | 64                     | 16                      |

## Supplementary Figure 1

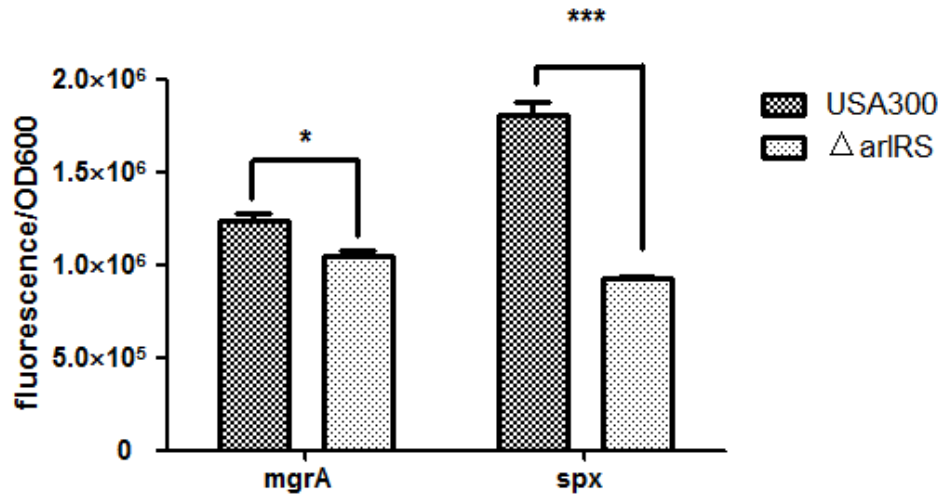

**Supplementary Figure 1. Effect of *arlRS* knockout on transcription of *spx* and *mgrA* (promoter-GFP reporter assay)**

A ~200 bp fragment containing the putative *mgrA* promoter or *spx* promoter region was amplified from the genomic DNA of USA300 TCH1516 strain and inserted into upstream of the GFP gene in pCM29. The resulting plasmids pCM29-*mgrA* and pCM29-*spx* were transformed into USA300 and  $\Delta arlRS$  strains by electroporation. The intensity of GFP fluorescence indicating either *spx* or *mgrA* expression was monitored with excitation at 480 nm and emission at 515 nm. The experiment was performed in quadruplicates and was repeated at least once. The representative result at 4 h was shown as mean values  $\pm$  standard derivations.

## Supplementary Figure 2

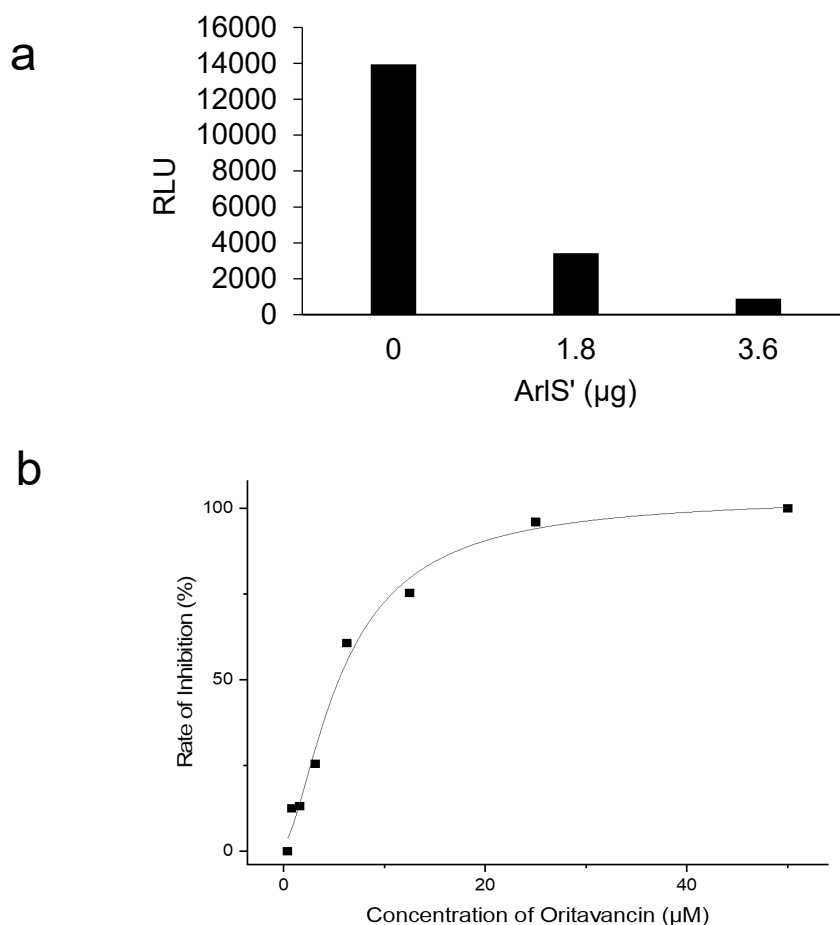

### Supplementary Figure 2. Inhibition of ArlS kinase activity by oritavancin

- (a) Detection of ATPase activity of the purified recombinant cytoplasmic domain of ArlS protein (ArlS') using the Kinase-Glo<sup>TM</sup> Luminescent Kinase Assay. Briefly, 1.8 μg and 3.6 μg purified ArlS' was incubated with 4 μM ATP in 50 μl reaction buffer [40 mM Tris (pH 7.5), 20 mM MgCl<sub>2</sub> and 0.1 mg/ml BSA] for 30 min at room temperature. Afterwards, 50 μl Kinase-Glo<sup>TM</sup> Reagent was added, mixed and kept at room temperature for 10 min before the final recording of the luminescence (RLU). The reactions were carried out in solid black, flat-bottomed 96-well plates.
- (b) Measurement of the inhibitory effect of oritavancin on the ArlS' ATPase activity. In brief, 3 μg purified ArlS' protein was pre-incubated with a series of dilutions of oritavancin (0.195, 0.39, 0.78, 1.56, 3.13, 6.25, 12.5, 25 and 50 μM) in reaction buffer at 4°C for 30 min, then 4 μM ATP was added and incubated for 30 min at room temperature. The dose-dependent inhibition of oritavancin on the ArlS' ATPase activity was measured with the Kinase-Glo<sup>TM</sup> Luminescent Kinase Assay, and the IC<sub>50</sub> value of oritavancin was calculated with the logistic regression fit using the Origin 7.0 software.

### Supplementary Figure 3

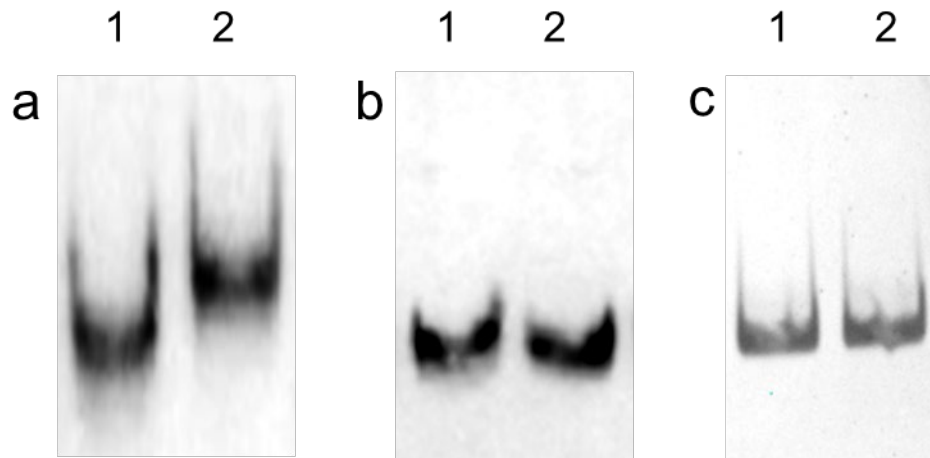

#### Supplementary Figure 3. Binding of rArlR to the different regions upstream of *spx* gene (EMSA)

**(a)** The 202 bp DNA fragment (263 bp to 62 bp upstream of the start codon of *spx*) was amplified, labeled with digoxin (DIG) and mixed with 0 and 2  $\mu$ g recombinant ArlR respectively (lane 1-2). **(b)** The 98 bp DNA fragment (329 bp to 232 bp upstream of the start codon of *spx*) was amplified, labeled with digoxin (DIG) and mixed with 0 and 2  $\mu$ g recombinant ArlR respectively (lane 1-2). The DIG-labeled DNA fragments were transferred to positively charged nylon membranes and visualized by an enzyme immunoassay using anti-Digoxigenin-AP, Fab-fragments and the chemiluminescent substrate CSPD. Chemiluminescent signals were recorded on X-ray film. **(c)** The 98 bp DNA fragment (129 bp to 33 bp upstream of the start codon of *spx*) was amplified by PCR. The 20 ng DNA fragment was mixed with 0 and 2  $\mu$ g recombinant ArlR respectively (lane 1-2). After electrophoresis in a native PAGE, the gel was stained with GelRed.

## Supplementary Figure 4

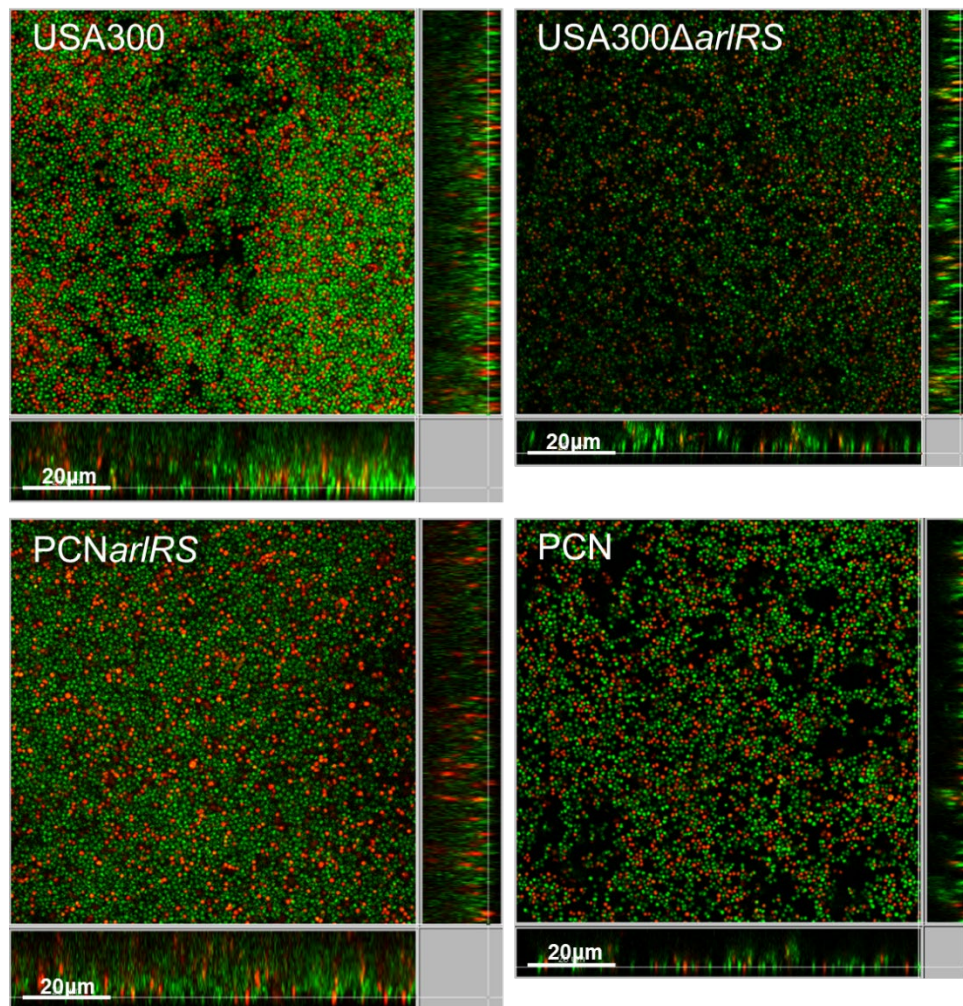

### Supplementary Figure 4. The effect of *arlRS* genes knockout on biofilm formation of USA300 strain by confocal laser scanning microscopy

Overnight cultures of *S. aureus* strains (USA300 -the USA300 TCH1516 wild type strain; USA300Δ*arlRS* -the *arlRS* knockout mutant; PCN<sup>*arlRS*</sup> -the *arlRS* complementation strain; PCN -a empty vector complementation strain for control) were diluted with TSB supplemented with 1% glucose at a ratio of 1:200, then inoculated in cell culture dishes with glass bottoms and incubated at 37°C for 24 h. After removal of planktonic cells, the biofilms were washed with PBS, stained with a Live/Dead BacLight Viability Kit, and subsequently analyzed with a Leica TCS SP8 confocal laser scanning microscope. A series of images were acquired at 1 μm intervals in the Z section to measure the biofilm thickness.
